# Supplementary material
Source: publisher site journal article supplement (https://www.dovepress.com/article/473575)
Supplement: Supplementary file 1 [file get_supplementary_file.php]

**Supplement**

*Table of Contents*

1. sTable 1: Spearman’s correlations between included variables

2. sFigures 1: Violin plots

a. Sensory processing sensitivity

b. Pain variables at baseline

3. sTable 2: Descriptive statistics by mood induction group

4. Differences between sensory sensitivity groups: Additional results

5. sFigures 2: Interaction plots

a. Sensitivity and pain variables combined with emotion regulation and social support

b. Sensitivity and pain variables combined with social support and parental bonding

1. **sTable 1: Spearman’s correlations between included variables**

**
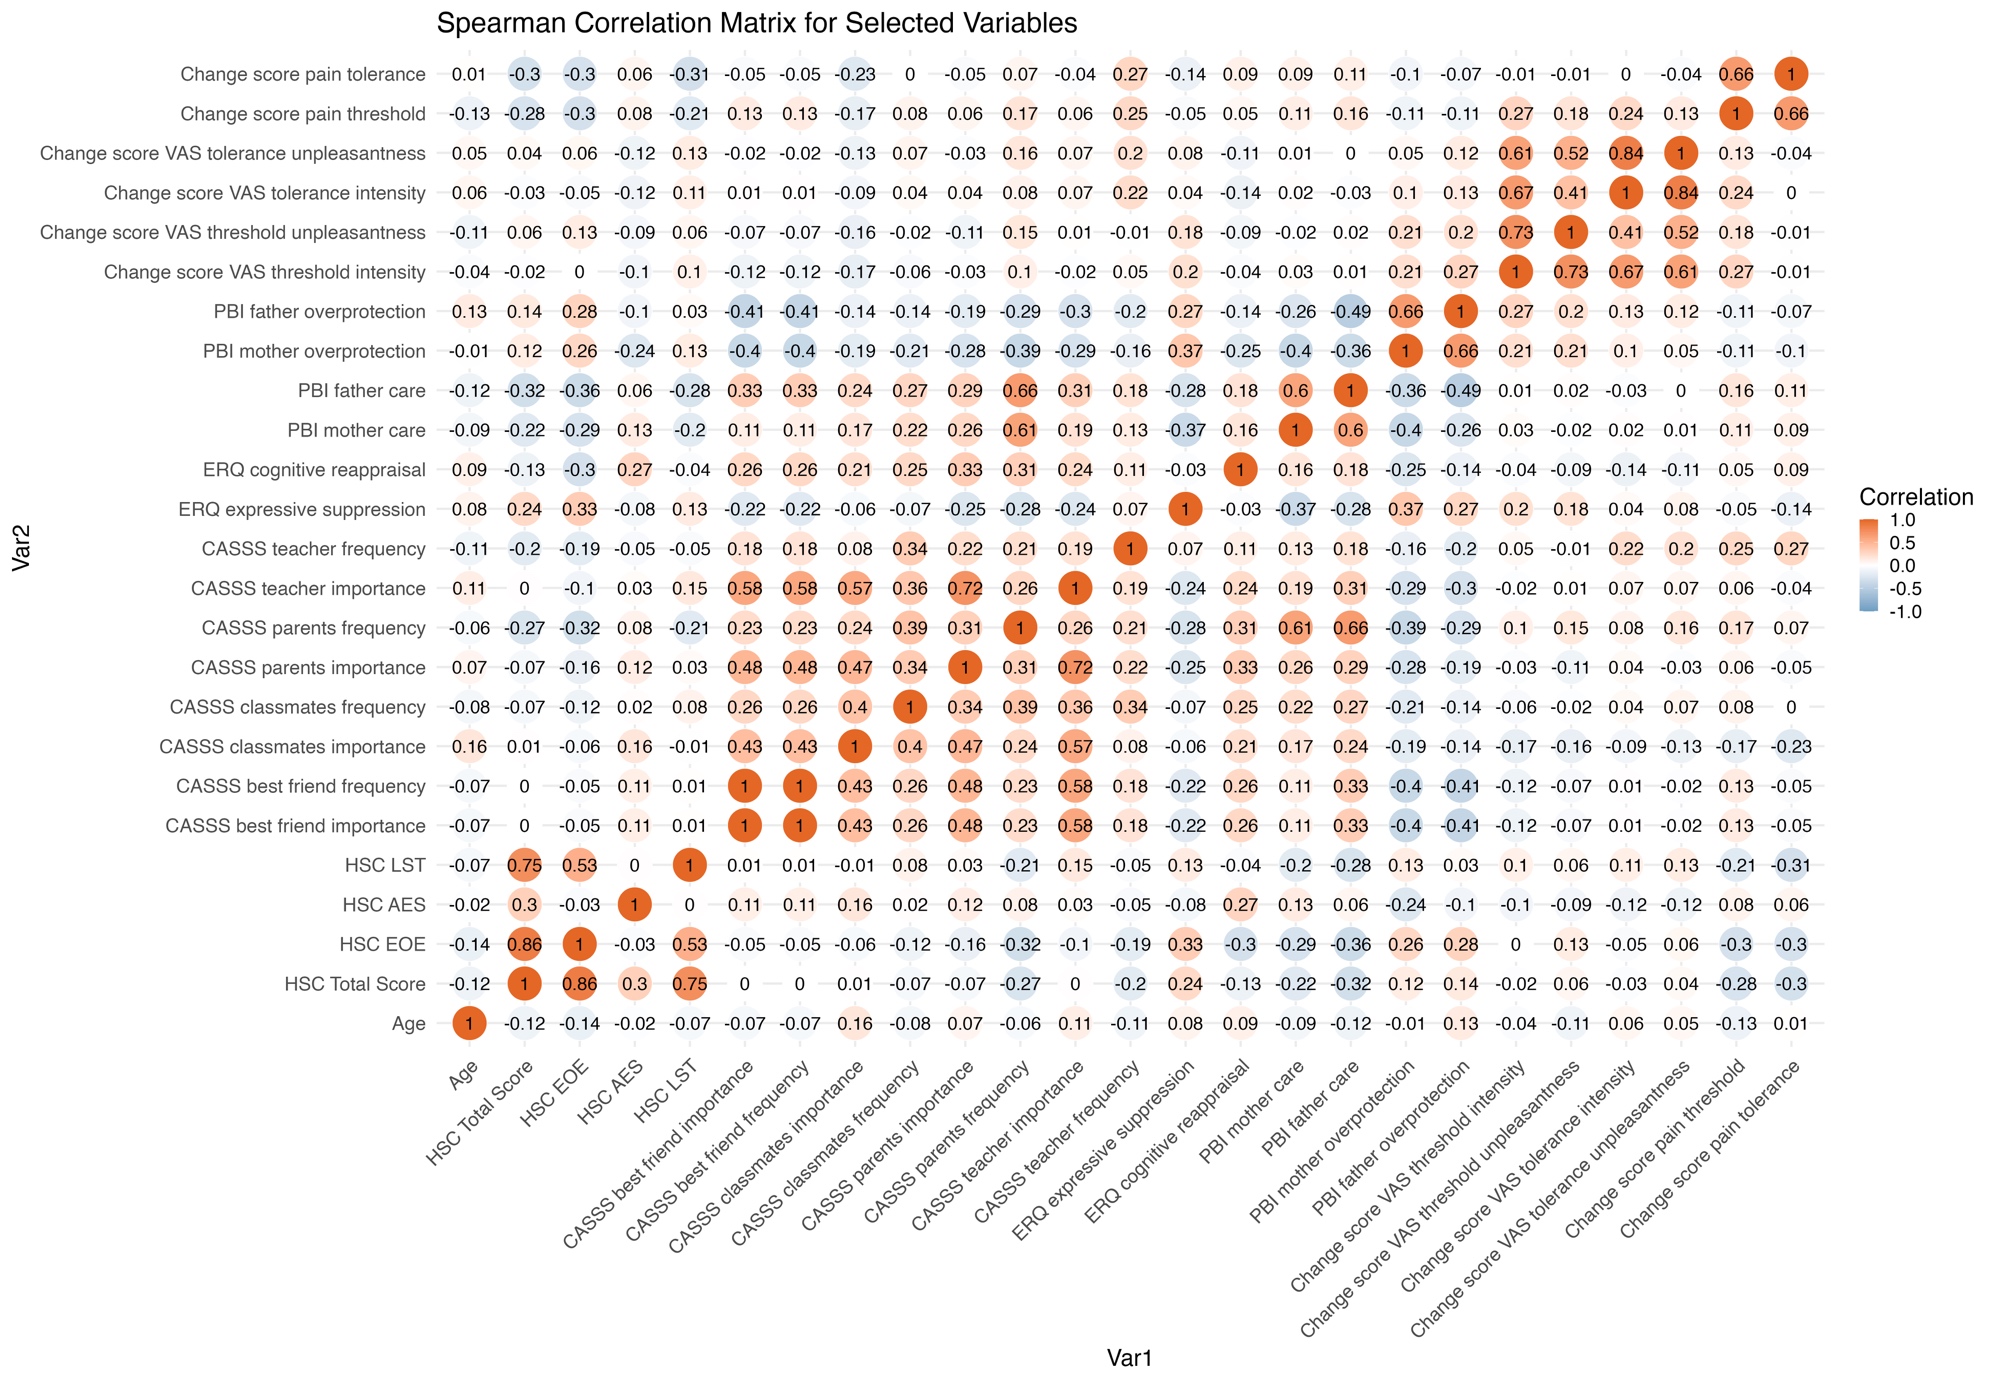
**

**2a. sFigure 1: Violin plots: Sensory processing sensitivity**

*Note.* HSC = Highly Sensitive Child Scale.(ai) Total score (HSC); (aii) Ease of excitation (HSC); (aiii) Aesthetic sensitivity (HSC); (aiv) Low sensory sensitivity.

**2b. Violin plots: Pain variables at baseline**

*Note.* M = Mean.(bi) Baseline VAS threshold intensity mean; (bii) Baseline VAS threshold unpleasantness mean; (biii) Baseline VAS tolerance intensity mean; (biv) Baseline VAS tolerance unpleasantness mean; (bv) Baseline Pain Tolerance, mean; (bvi) Baseline Pain Threshold mean.

**3.** **sTable 2: Descriptive statistics by mood induction group**

| Variable | | Induced emotional state neutral *(N = 33)* | |  | Induced emotional state negative *(N = 33)* | Induced emotional state positive *(N = 34)* | *p* |
| --- | --- | --- | --- | --- | --- | --- | --- |
| Baseline | |  | |  |  |  |  |
| VAS threshold intensity, *M* (*SD*) | | 45.32 (160.54) |  | 24.39 (79.72) | 5.38 (2.23) | .012 |
| VAS threshold unpleasantness, *M* (*SD*) | | 4.23 (2.93) |  | 3.57 (2.47) | 4.25 (2.75) | .800 |
| VAS tolerance intensity, *M* (*SD*) | | 17.18 (57.93) |  | 6.51 (2.08) | 16.94 (56.89) | .579 |
| VAS tolerance unpleasantness, *M* (*SD*) | | 6.38 (3.05) |  | 5.92 (2.41) | 6.5 (2.55) | .620 |
| Heat pain tolerance, *M* (*SD*) | | 48.52 (1.67) |  | 49.01 (1.21) | 48.69 (1.66) | .627 |
| Heat pain threshold, *M* (*SD*) | | 46.13 (2.86) |  | 46.3 (1.94) | 45.13 (3.31) | .425 |
| Post mood induction | |  | |  |  |  |  |
| VAS threshold intensity, *M* (*SD*) | | 14.89 (59.09) |  | 13.15 (57.45) | 13.96 (56.41) | .400 |
| VAS threshold unpleasantness, *M* (*SD*) | | 3.01 (2.6) |  | 2.4 (1.92) | 3.14 (2.22) | .566 |
| VAS tolerance intensity, *M* (*SD*) | | 16.75 (57.9) |  | 16.62 (56.89) | 16.74 (57.04) | .192 |
| VAS tolerance unpleasantness, *M* (*SD*) | | 5.83 (3.01) |  | 5.98 (2.57) | 6.4 (2.73) | .482 |
| Heat pain tolerance, *M* (*SD*) | | 47.88 (2.12) |  | 48.51 (1.45) | 48.15 (1.87) | .520 |
| Heat pain threshold, *M* (*SD*) | | 43.7 (3.84) |  | 43.51 (3.08) | 43.43 (3.6) | .348 |
| Highly sensitive child scale values | |  | |  |  |  |  |
| Total score, *M* (*SD*) | | 4.6 (0.77) |  | 4.53 (0.58) | 4.72 (0.69) | .693 |
| Ease of excitation (EOE), *M* (*SD*) | | 4.32 (1.25) |  | 4.27 (0.82) | 4.3 (1.06) | .403 |
| Aesthetic sensitivity (AES), *M* (*SD*) | | 5.77 (0.68) |  | 5.73 (0.86) | 5.81 (0.7) | .815 |
| Low sensory threshold (LST), *M* (*SD*) | | 3.52 (1.1) |  | 3.35 (1.07) | 3.95 (1.24) | .143 |
| Low sensitivity group, *n* (%) | | 4 (12.12) |  | 1 (3.03) | 2 (5.88) |  |
| Medium sensitivity group, *n* (%) | | 13 (39.39) |  | 19 (57.58) | 17 (50.00) |  |
| High sensitivity group, *n* (%) | | 6 (48.48) |  | 13 (39.39) | 15 (44.12) |  |
| *Note.* *M* and *SD* are used to represent mean and standard deviation. *p* is used to describe the p-value. | | | | | | |  | |

**4. Differences between sensory sensitivity groups: Additional results**

Group differences were additionally found for the ERQ subscale for expressive suppression (F(2,97) = 6.116, *p* < 0.05). The highest sensitivity group scored highest (*M* = 4.16, *SD* = 1.08), followed by the medium (*M* = 3.90, *SD* = 1.17) and the lowest group (*M* = 3.30, *SD* = 1.40).

Significant group differences were also found on the CASSS subscale for frequency of classmate support (F(2,97) = 3.091, *p* < 0.05). The highest scoring group was the low sensitivity group (*M* = 3.68, *SD* = 0.95), followed by the high sensitivity group (*M* = 3.51, *SD* = 0.59) and the medium sensitivity group (*M* = 3.18, *SD* = 0.94; see Table 4). The same pattern was found for the CASSS subscale for frequency of teacher support (F(2,96) = 4.340, *p* < 0.05) (low sensitivity group, *M* = 3.52, *SD* = 1.07; high sensitivity group *M* = 2.99, *SD* = 0.73; medium sensitivity group, *M* = 2.93, *SD* = 0.82).

Also, significant differences were also found for father care of the PBI scale (F(2,97) = 4.989, *p* < 0.01). The highest scoring group was the low sensitivity group (*M* = 27.8, *SD* = 1.25), followed by the medium (*M* = 25.2, *SD* = 1.18) and low (*M* = 22.2, *SD* = 1.25) group.

No differences were found in cognitive reappraisal (ERQ), all CASSS subscales except the teacher and classmate frequency subscale, and the two PBI subscales for overprotection and maternal care.

**Fixed-Effects ANOVA concerning sensitivity group differences**

| Predictor | Sum  of  Squares | *df* | Mean  Square | *F* | *p* | partial η2 | partial η2  90% CI  [LL, UL] |
| --- | --- | --- | --- | --- | --- | --- | --- |
| Expressive suppression (ERQ) | | | | | | | |
| (Intercept) | 1428.66 | 1 | 1428.66 | 957.49 | .000 |  |  |
| Sensitivity group | 12.23 | 2 | 6.12 | 4.10 | .020 | .08 | [.01, .16] |
| Error | 144.73 | 97 | 1.49 |  |  |  |  |
| Classmates frequency (CASSS) | | | | | | | |
| (Intercept) | 1190.20 | 1 | 1190.20 | 1653.01 | .000 |  |  |
| Sensitivity group | 4.45 | 2 | 2.23 | 3.09 | .050 | .06 | [.00, .14] |
| Error | 69.84 | 97 | 0.72 |  |  |  |  |
| Teacher frequency (CASSS) | | | | | | | |
| (Intercept) | 974.70 | 1 | 974.70 | 1239.81 | .000 |  |  |
| Sensitivity group | 6.82 | 2 | 3.41 | 4.34 | .016 | .08 | [.01, .17] |
| Error | 75.47 | 96 | 0.79 |  |  |  |  |
| Father care (PBI) | | | | | | | |
| (Intercept) | 62671.68 | 1 | 62671.68 | 1244.94 | .000 |  |  |
| Sensitivity group | 502.27 | 2 | 251.13 | 4.99 | .009 | .09 | [.01, .18] |
| Error | 4883.09 | 97 | 50.34 |  |  |  |  |

*Note.* LL and UL represent the lower-limit and upper-limit of the partial η2 confidence interval, respectively.

**5a. sFigure 2: Interaction plots: Sensitivity and pain variables combined with emotion regulation and social support**

(ai) Interaction between low sensory threshold and expressive suppression; (aii) Interaction between aesthetic sensitivity and best friend importance; (aiii) Interaction between aesthetic sensitivity and best friend importance; (aiv) Interaction between aesthetic sensitivity and best friend frequency; (av) Interaction between aesthetic sensitivity and best friend frequency.

**5b. Interaction plots: Sensitivity and pain variables combined with social support and parental bonding**

(bi) Interaction between aesthetic sensitivity and teacher importance; (bii) Interaction between aesthetic sensitivity and teacher importance; (biii) Interaction between aesthetic sensitivity and teacher frequency; (biv) Interaction between aesthetic sensitivity and father overprotection; (bv) Interaction between low sensory threshold and father overprotection.
